# Supplementary material
Source: PubMed Central journal article supplement (PMC3318049)
Supplement: supp_0022034510375282_JDR375282_Online_Appendix.pdf [file supp_0022034510375282_JDR375282_Online_Appendix.pdf]

S.L. Russell<sup>1\*</sup>, J.R. Ickovics<sup>2</sup>, and R.A. Yaffee<sup>3</sup>

<sup>1</sup>Department of Epidemiology & Health Promotion, NYU College of Dentistry, 250 Park Avenue South, Room 635, New York, NY 10003, USA; <sup>2</sup>Yale University, New Haven, CT, USA; and <sup>3</sup>Silver School of Social Work, New York University, New York, NY, USA; \*corresponding author, slr6@nyu.edu

# Parity & Untreated Dental Caries in US Women

*J Dent Res* 89(10):1091-1096, 2010

## APPENDIX

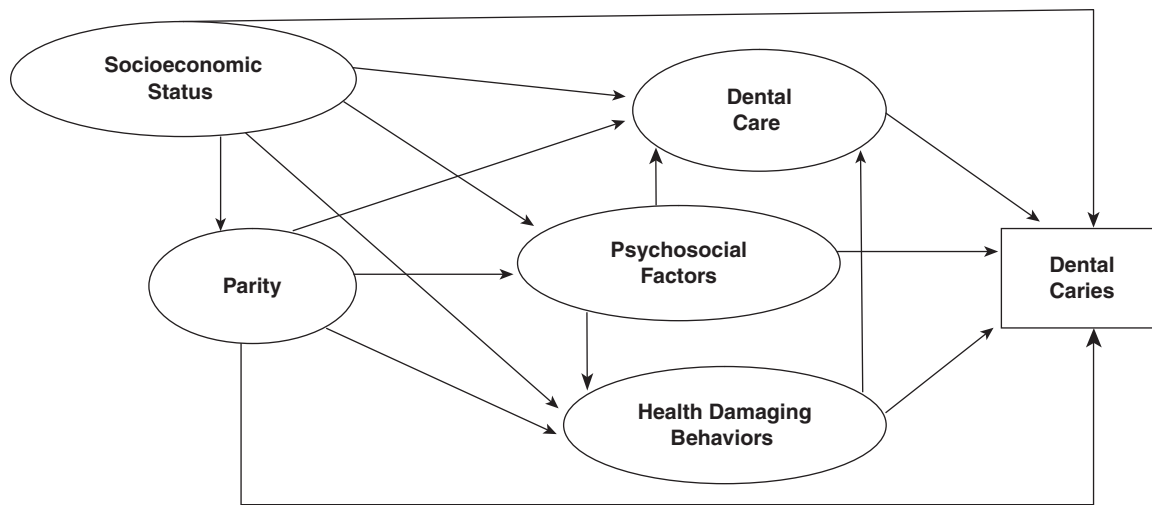

**Appendix Figure 1.** Model of parity/dental disease relationship, based on Adler *et al.* (1993).

**Appendix Figure 2.** Study sample selection, Black and White women, parity-carries analysis, NHANES III.

**Appendix Table.** Results of Confirmatory Robust Regression for Dependent Variables: Filled Surfaces and Decayed Surfaces, Black and White Women Ages 18-64 yrs, NHANES III (n = 2635)

|                       | Confirmatory Regression Algorithm (management of outliers) (rreg) |                      |         |
|-----------------------|-------------------------------------------------------------------|----------------------|---------|
|                       | Coefficient                                                       | 95% CI               | p       |
| Filled Surfaces       |                                                                   |                      |         |
| Socio-economic status | 0.120                                                             | 0.115, 0.124         | ≤ 0.001 |
| Race                  | 1.066                                                             | 0.868, 1.264         | ≤ 0.001 |
| Dental insurance      | 0.584                                                             | 0.234, 0.934         | = 0.001 |
| Dental care frequency | 0.084                                                             | 0.046, 0.123         | ≤ 0.001 |
| Marital status        | 0.015                                                             | 0.003, 0.026         | = 0.013 |
| Age/time              | 6.000                                                             | 5.387, 6.604         | ≤ 0.001 |
|                       |                                                                   | F (6, 2628) = 160.15 |         |
| Decayed Surfaces*     |                                                                   |                      |         |
| Socio-economic status |                                                                   |                      |         |
| Race                  |                                                                   |                      |         |
| Births                |                                                                   |                      |         |
| Dental insurance      |                                                                   |                      |         |
| Dental care frequency |                                                                   |                      |         |
| Age/time              |                                                                   |                      |         |

\*Not able to be calculated
